# Supplementary material
Source: PubMed Central journal article supplement (PMC8641555)
Supplement: CanJDentHyg-55-3-148-a-supplementary-table1.pdf [file CanJDentHyg-55-3-148-a-supplementary-table1.pdf]

## SUPPLEMENTARY MATERIAL

Limeback H, Enax, J, Meyer F. Biomimetic hydroxyapatite and caries prevention: a systematic review and meta-analysis. *Can J Dent Hyg.* 2021;55(3):148–59.

Table S1. PRISMA-S checklist

| Section/topic                          | #  | Checklist item                                                                                                                                                                                                                                                     | Location(s) reported                                                                                                                                                         |
|----------------------------------------|----|--------------------------------------------------------------------------------------------------------------------------------------------------------------------------------------------------------------------------------------------------------------------|------------------------------------------------------------------------------------------------------------------------------------------------------------------------------|
| <b>INFORMATION SOURCES AND METHODS</b> |    |                                                                                                                                                                                                                                                                    |                                                                                                                                                                              |
| Database name                          | 1  | Name each individual database searched, stating the platform for each.                                                                                                                                                                                             | OID MEDLINE/PubMed, Elsevier Scopus, EMBASE, Web of Science, Google Scholar                                                                                                  |
| Multi-database searching               | 2  | If databases were searched simultaneously on a single platform, state the name of the platform, listing all of the databases searched.                                                                                                                             | University of Toronto Library                                                                                                                                                |
| Study registries                       | 3  | List any study registries searched.                                                                                                                                                                                                                                | clinicaltrials.gov/<br>who.int/clinical-trials-registry-platform/the-ictrp-search-portal<br>cochranelibrary.com/central                                                      |
| Online resources and browsing          | 4  | Describe any online or print source purposefully searched or browsed (e.g., tables of contents, print conference proceedings, websites), and how this was done.                                                                                                    | IADR.org<br>orca-caries-research.org/                                                                                                                                        |
| Citation searching                     | 5  | Indicate whether cited references or citing references were examined, and describe any methods used for locating cited/citing references (e.g., browsing reference lists, using a citation index, setting up email alerts for references citing included studies). | Titles were browsed in all databases. The citations in the reference lists of the full papers retrieved and read were browsed for citations missed in the literature search. |
| Contacts                               | 6  | Indicate whether additional studies or data were sought by contacting authors, experts, manufacturers, or others.                                                                                                                                                  | Experts in the dental profession in Canada were contacted about hydroxyapatite in oral care products.                                                                        |
| Other methods                          | 7  | Describe any additional information sources or search methods used.                                                                                                                                                                                                | Contact with the dental profession in Germany revealed more foreign language studies.                                                                                        |
| <b>SEARCH STRATEGIES</b>               |    |                                                                                                                                                                                                                                                                    |                                                                                                                                                                              |
| Full search strategies                 | 8  | Include the search strategies for each database and information source, copied and pasted exactly as run.                                                                                                                                                          | See supplemental table S2                                                                                                                                                    |
| Limits and restrictions                | 9  | Specify that no limits were used, or describe any limits or restrictions applied to a search (e.g., date or time period, language, study design) and provide justification for their use.                                                                          | The final date of the search was March 15, 2021. All languages were accepted. All open access papers were accepted.                                                          |
| Search filters                         | 10 | Indicate whether published search filters were used (as originally designed or modified), and if so, cite the filter(s) used.                                                                                                                                      | No filters were used.                                                                                                                                                        |
| Prior work                             | 11 | Indicate when search strategies from other literature reviews were adapted or reused for a substantive part or all of the search, citing the previous review(s).                                                                                                   | There were no previous searches used.                                                                                                                                        |
| Updates                                | 12 | Report the methods used to update the search(es) (e.g., rerunning searches, email alerts).                                                                                                                                                                         | Two authors had a previous list of published papers. These provided 6 of the 30 additional publications found outside of the search.                                         |
| Dates of searches                      | 13 | For each search strategy, provide the date when the last search occurred.                                                                                                                                                                                          | March 15, 2021 (all searches)                                                                                                                                                |

Table S1. *continued*

| Section/topic           | #  | Checklist item                                                                                                                     | Location(s) reported                                                                                                        |
|-------------------------|----|------------------------------------------------------------------------------------------------------------------------------------|-----------------------------------------------------------------------------------------------------------------------------|
| <b>PEER REVIEW</b>      |    |                                                                                                                                    |                                                                                                                             |
| Peer review             | 14 | Describe any search peer review process.                                                                                           | Peer review was not done in advance. It will be based on the CJDH manuscript peer-review process.                           |
| <b>MANAGING RECORDS</b> |    |                                                                                                                                    |                                                                                                                             |
| Total records           | 15 | Document the total number of records identified from each database and other information sources.                                  | See supplemental table S3                                                                                                   |
| Deduplication           | 16 | Describe the processes and any software used to deduplicate records from multiple database searches and other information sources. | Duplicates were found manually and by using keyword searches in PDF printouts of lists of papers generated in the searches. |

Source: Rethlefsen ML, Kirtley S, Waffenschmidt S, Ayala AP, Moher D, Page MJ, et al. PRISMA-S Group PRISMA-S: An Extension to the PRISMA Statement for Reporting Literature Searches in Systematic Reviews.<sup>30</sup>

## REFERENCE

Limeback H, Enax, J, Meyer F. Biomimetic hydroxyapatite and caries prevention: a systematic review and meta-analysis. *Can J Dent Hyg.* 2021;55(3):148–59.
